# Supplementary material for: DSSR: an integrated software tool for dissecting the spatial structure of RNA
Source: PubMed Central journal article supplement — Nucleic Acids Res. 2015 Jul 15;43(21):e142. doi: 10.1093/nar/gkv716 (PMC4666379; doi:10.1093/nar/gkv716), 2015-07-15
Supplement: supp_gkv716_gkv716-supplementary-data.pdf [file supp_gkv716_gkv716-supplementary-data.pdf]

# Supplementary Data

“DSSR: an integrated software tool for dissecting the spatial structure of RNA” by Lu *et al.*

## Supplementary Figures

- S1** The four base triplets and associated hydrogen bonds detected by DSSR in yeast tRNA<sup>Phe</sup> (PDB id: 1ehz) ..... [Page 1](#)
- S2** Three similarly positioned base pairs hold the D- and T-loops of tRNA<sup>Phe</sup> (PDB id: 1ehz) and its viral mimic (PDB id: 4p5j) in place ..... [Page 2](#)
- S3** The four base triplets and associated hydrogen bonds detected by DSSR in the viral tRNA mimic (PDB id: 4p5j) ..... [Page 3](#)
- S4** The four base multiplets and associated hydrogen bonds detected by DSSR in the *env22* twister ribozyme (PDB id: 4rge) ..... [Page 4](#)
- S5** Ribbon representations of the junction loop in the *env22* twister ribozyme (PDB id: 4rge) ..... [Page 5](#)
- S6** The k-turn identified by DSSR in the SAM-I riboswitch (PDB id: 2gis) . [Page 6](#)
- S7** The eight base triplets and associated hydrogen bonds detected by DSSR in the SAM-I riboswitch (PDB id: 2gis) ..... [Page 7](#)
- S8** The linear (arc) secondary structure diagram of the RNA-DNA hybrid structure in the CRISPR Cas9-sgRNA-DNA ternary complex (PDB id: 4oo8) ..... [Page 8](#)
- S9** Images of 15 diloops (GGUC, CARG, CUUG, CUAG, and UUKA) identified by DSSR in the NR3A-dataset ..... [Page 9](#)

## Supplementary Sample Output

- Output of a sample DSSR run on yeast tRNA<sup>Phe</sup> (PDB id: 1ehz) ..... [Page 10](#)

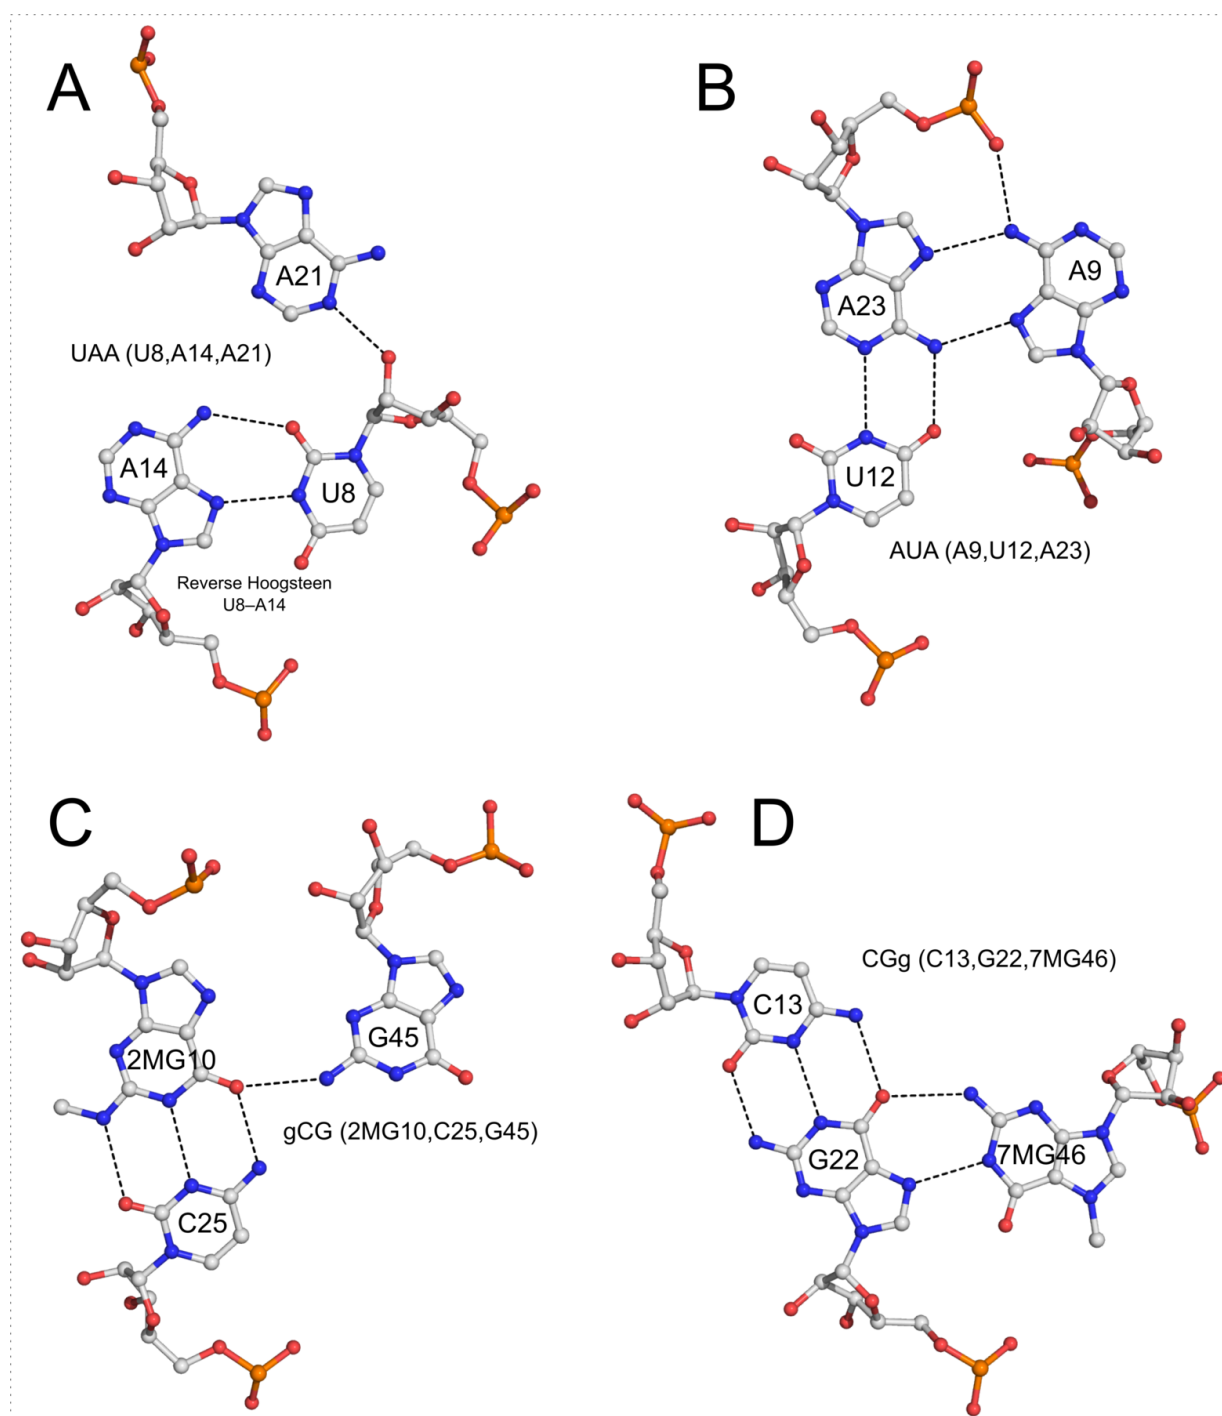

**Figure S1:** The four base triplets and associated hydrogen bonds (dashed lines) detected by DSSR in yeast tRNA<sup>Phe</sup> (PDB id: 1ehz). **(A)** UAA (U8,A14,A21), with a reverse Hoogsteen U8–A14 pair. **(B)** AUA (A9,U12,A23). **(C)** gCG (2MG10,C25,G45). **(D)** CGg (C13,G22,7MG46). Here, the bases in each triplet are listed in sequential order, with the one-letter shorthand followed by more detailed identifiers in parentheses. In **(C)** and **(D)**, the lower case 'g' represents the shortened name for modified guanine nucleotides 2MG10 and 7MG46, respectively. Note that the triplets and hydrogen bonds match those originally reported by Quigley and Rich for yeast tRNA<sup>Phe</sup>.

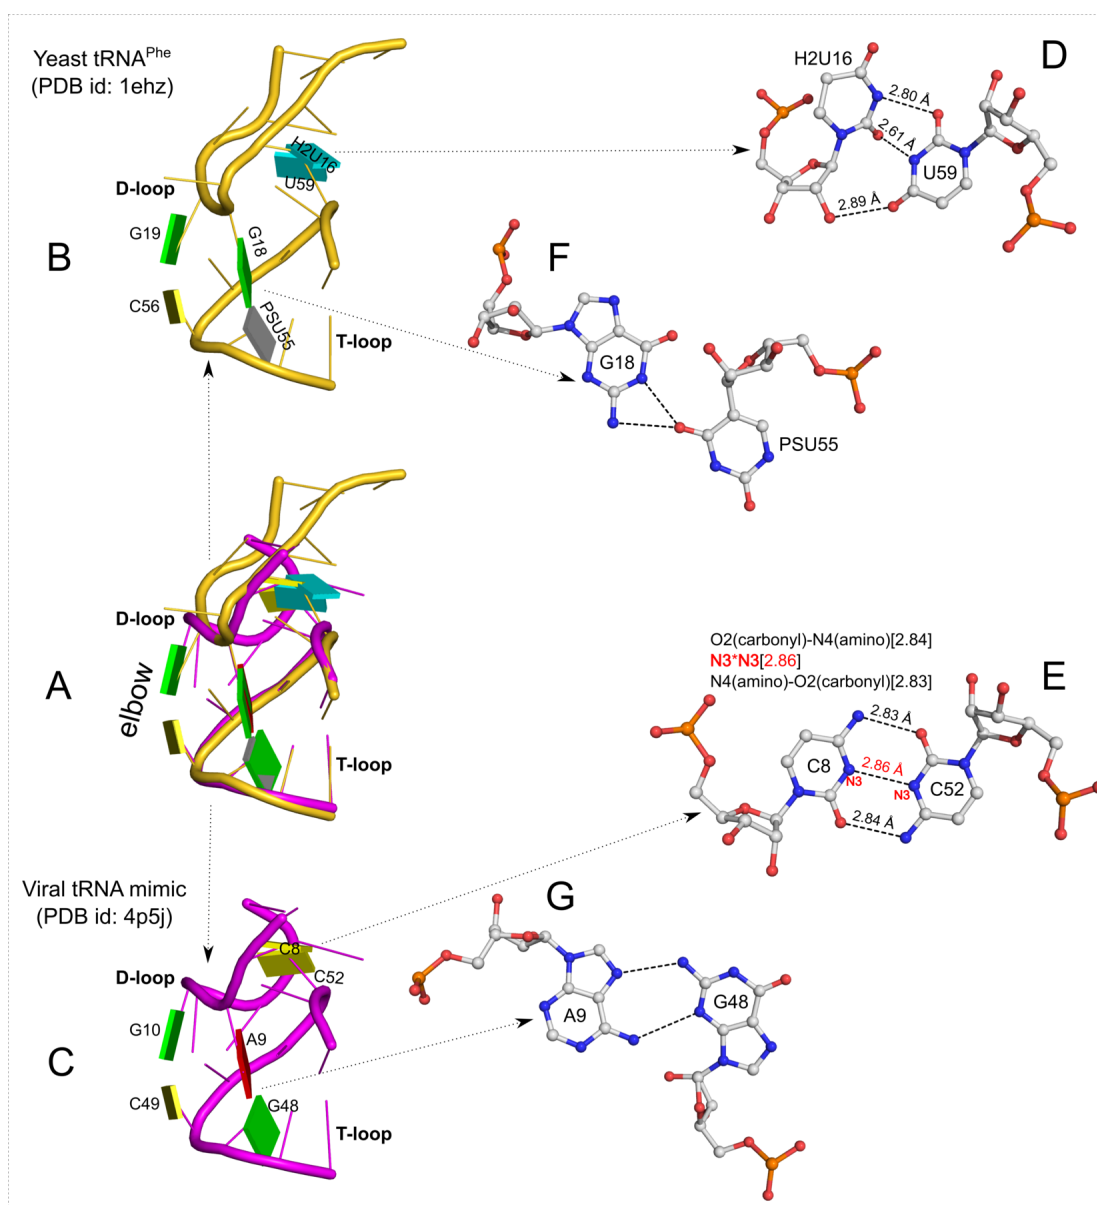

**Figure S2:** Three similarly positioned base pairs that hold the D- and T-loops of tRNA<sup>Phe</sup> (PDB id: 1ehz, gold) and its viral mimic (PDB id: 4p5j, magenta) in place. The interacting loops in the two molecules are overlaid on the reference frame of the common elbow G–C pair, which is oriented vertically with its major-groove edge facing the viewer, roughly matching Figures 2 and 3 (A–C). Since the two elbow G–C pairs have very similar base-pair parameters, they overlap nearly perfectly. Despite large structural variations between the D-loops, the H2U16+U59 pair in tRNA (B, detailed in D) is similar to the presumably semi-protonated C8+C52 pair (forming an i-motif) in the mimic (C, detailed in E). The other two pairs near the elbow (F and G) are also strikingly alike, despite dramatically different modes of interaction. Note that DSSR identifies the C+C pair (E) with the assumed acceptor-acceptor (N3 to N3) hydrogen bond highlighted (red).

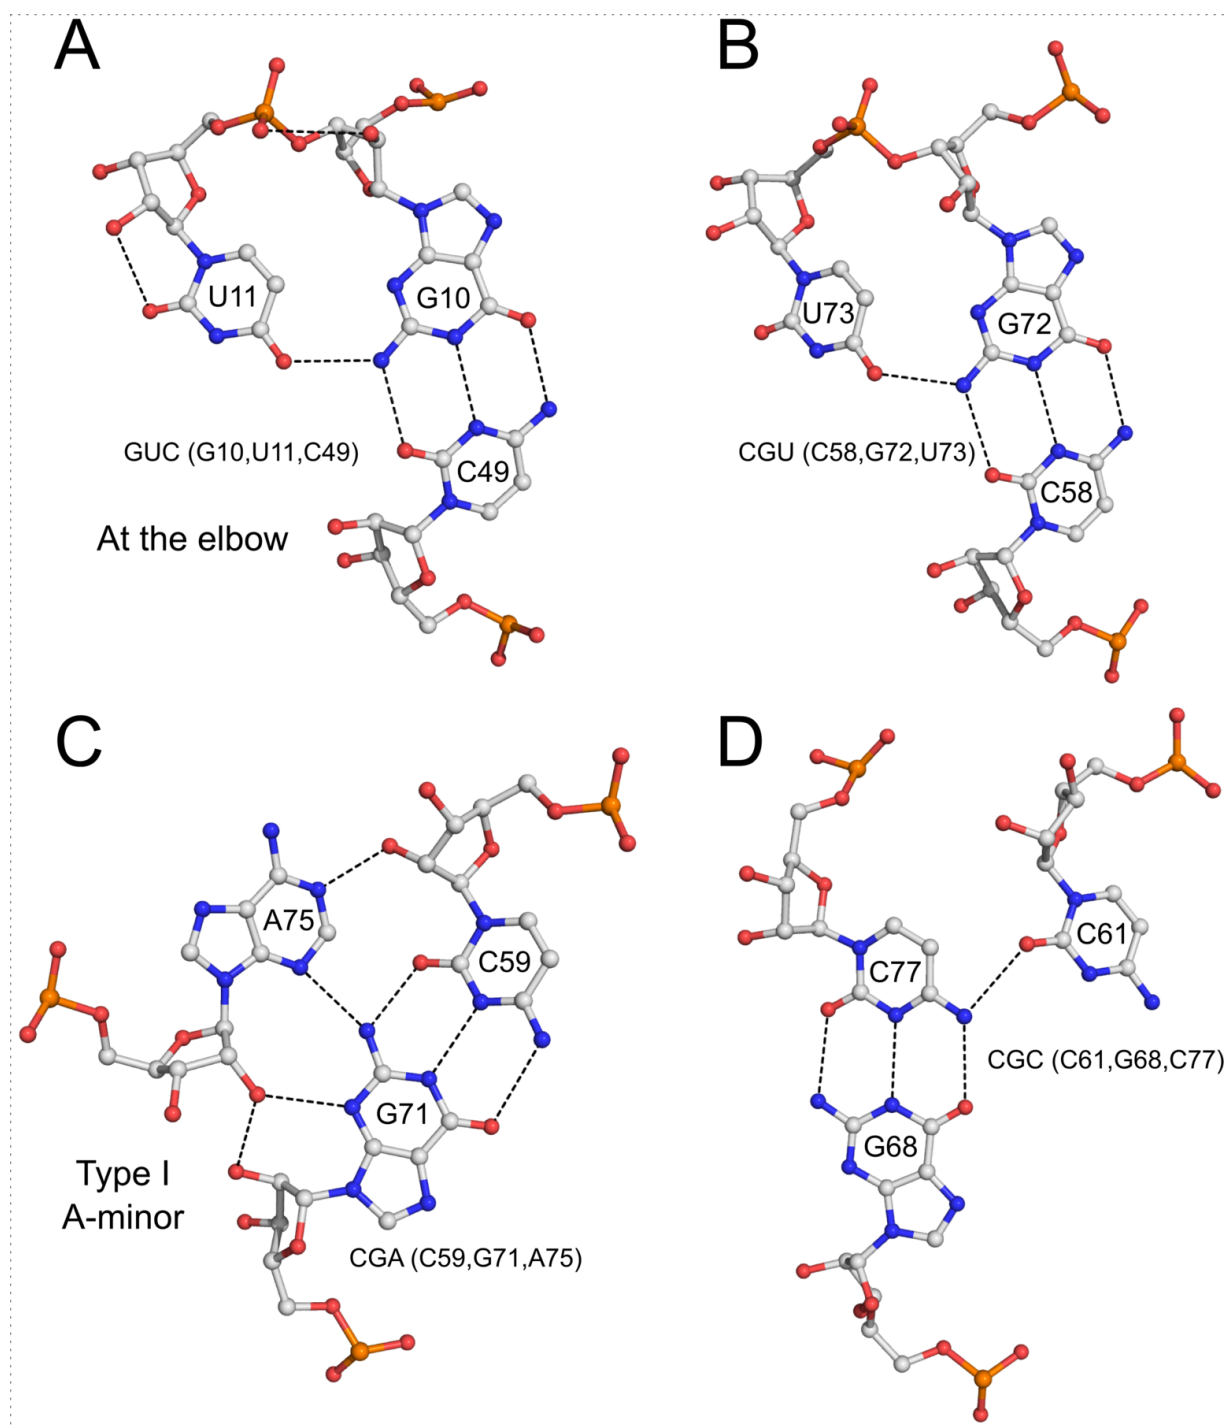

**Figure S3:** The four base triplets and associated hydrogen bonds (dashed lines) detected by DSSR in the viral tRNA mimic (PDB id: 4p5j) from turnip yellow mosaic virus. **(A)** GUC (G10,U11,C49) lies at the elbow of the L-shaped tertiary structure, with G10 and U11 forming a GpU dinucleotide platform. **(B)** CGU (C58,G72,U73) includes another GpU (G72 and U73) platform, with a single base-base hydrogen bond. **(C)** CGA (C59,G71,A75) forms a type I A-minor motif. **(D)** CGC (C61,G68,C77) contains a loop nucleotide (C61) from the hairpin-type pseudoknot. The last three triplets **(B-D)** are located at the 3'-end of the structure around the hairpin-type pseudoknot.

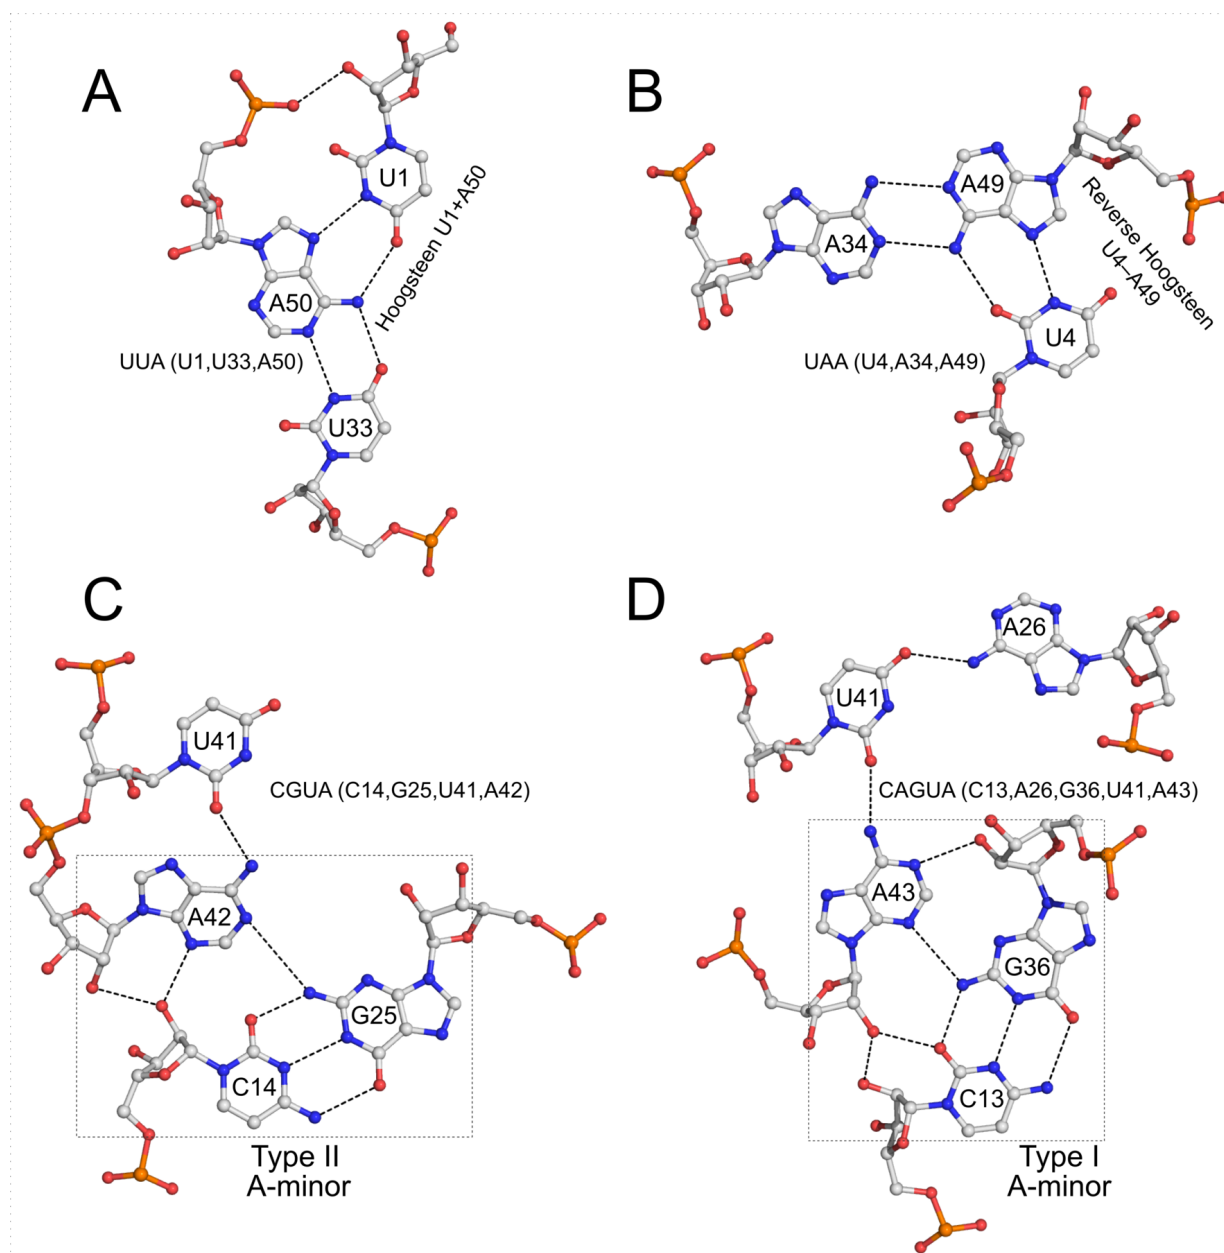

**Figure S4:** The four base multipliers and associated hydrogen bonds (dashed lines) detected by DSSR in the *env22* twister ribozyme (chain A, PDB id: 4rge). **(A)** Triplet UUA (U1, U33, A50) where U1 and A50 form a Hoogsteen pair (U1+A50). **(B)** Triplet UAA (U4, A34, A49) where U4 and A49 form a reverse Hoogsteen pair (U4-A49). **(C)** Quadruplet CGUA (C14, G25, U41, A42) which includes a type II A-minor motif. **(D)** Pentaplet CAGUA (C13, A26, G36, U41, A43) which contains a type I A-minor motif. The two neighboring A-minor motifs (in **C** and **D**) are part of a larger structural framework involving U41 and A26 (see Figure 4).

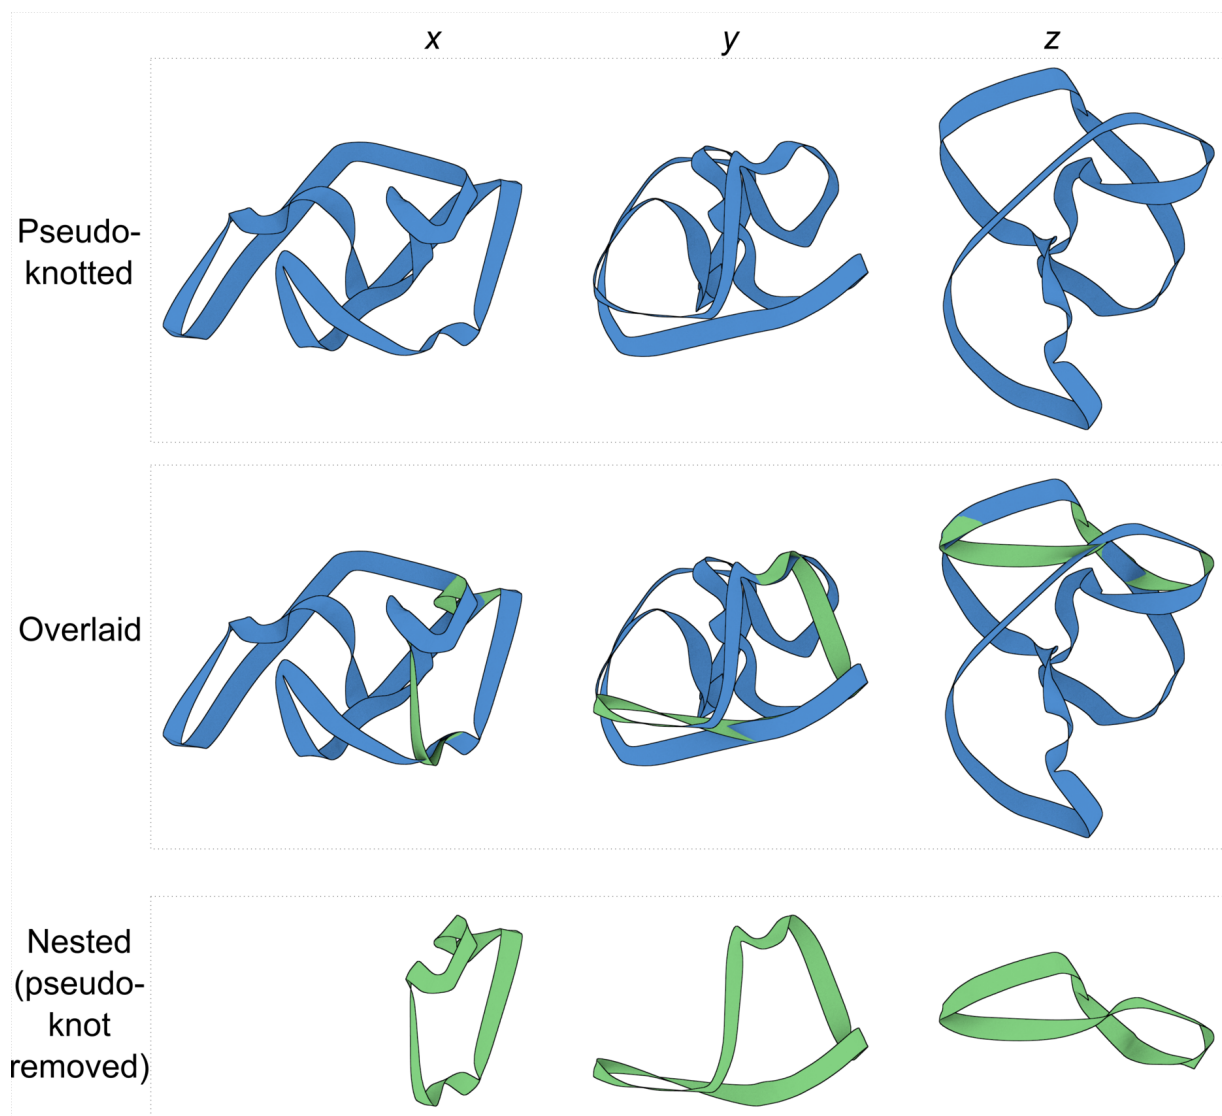

**Figure S5:** Ribbon representations of the junction loop in the *env22* twister ribozyme (PDB id: 4rge). The ribbons are defined in terms of the C1' and P atoms of the nucleotides that make up the junction loop. Inclusion of pseudoknots in the analysis of the structure reveals a  $[4,2,2,0,1,3,0,0,1,1]$  ten-way junction and a ribbon that follows a supercoiled pathway, with a linking number of three (blue, top row). Upon pseudoknot removal, only a  $[2,1,3]$  three-way junction and a ribbon with a simple relaxed circular configuration remain (green, bottom row). The overlap of the two junction loops in the middle row clearly shows that the over-simplified three-way junction spans only a small portion of the ten-way loop. The ribbons are shown in three projections: down the  $x$ -axis (left column), the  $y$ -axis (middle column), and the  $z$ -axis (right column). The images were kindly generated by Dr. Nicolas Clauvelin using the approach described in ref. 52.

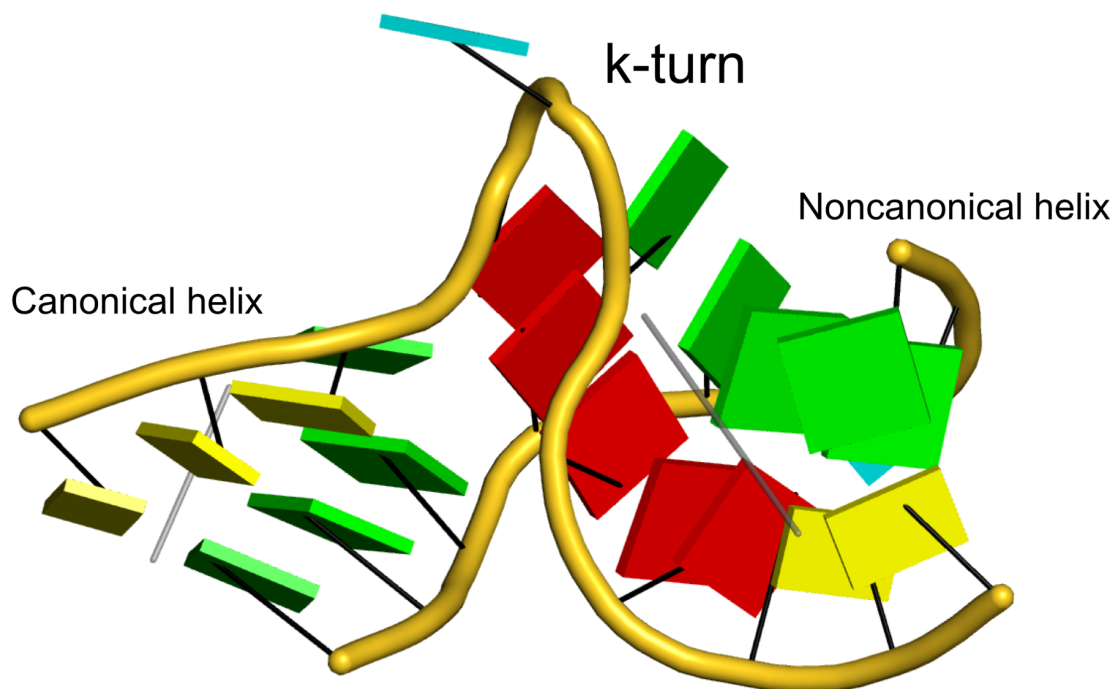

**Figure S6:** The k-turn identified by DSSR in the SAM-I riboswitch (PDB id: 2gis). Base-stacking interactions are interrupted around the k-turn even though the backbone is continuous along each strand. Thus DSSR assigns two helices (depicted by gray lines), the canonical helix on the left, and the noncanonical one on the right.

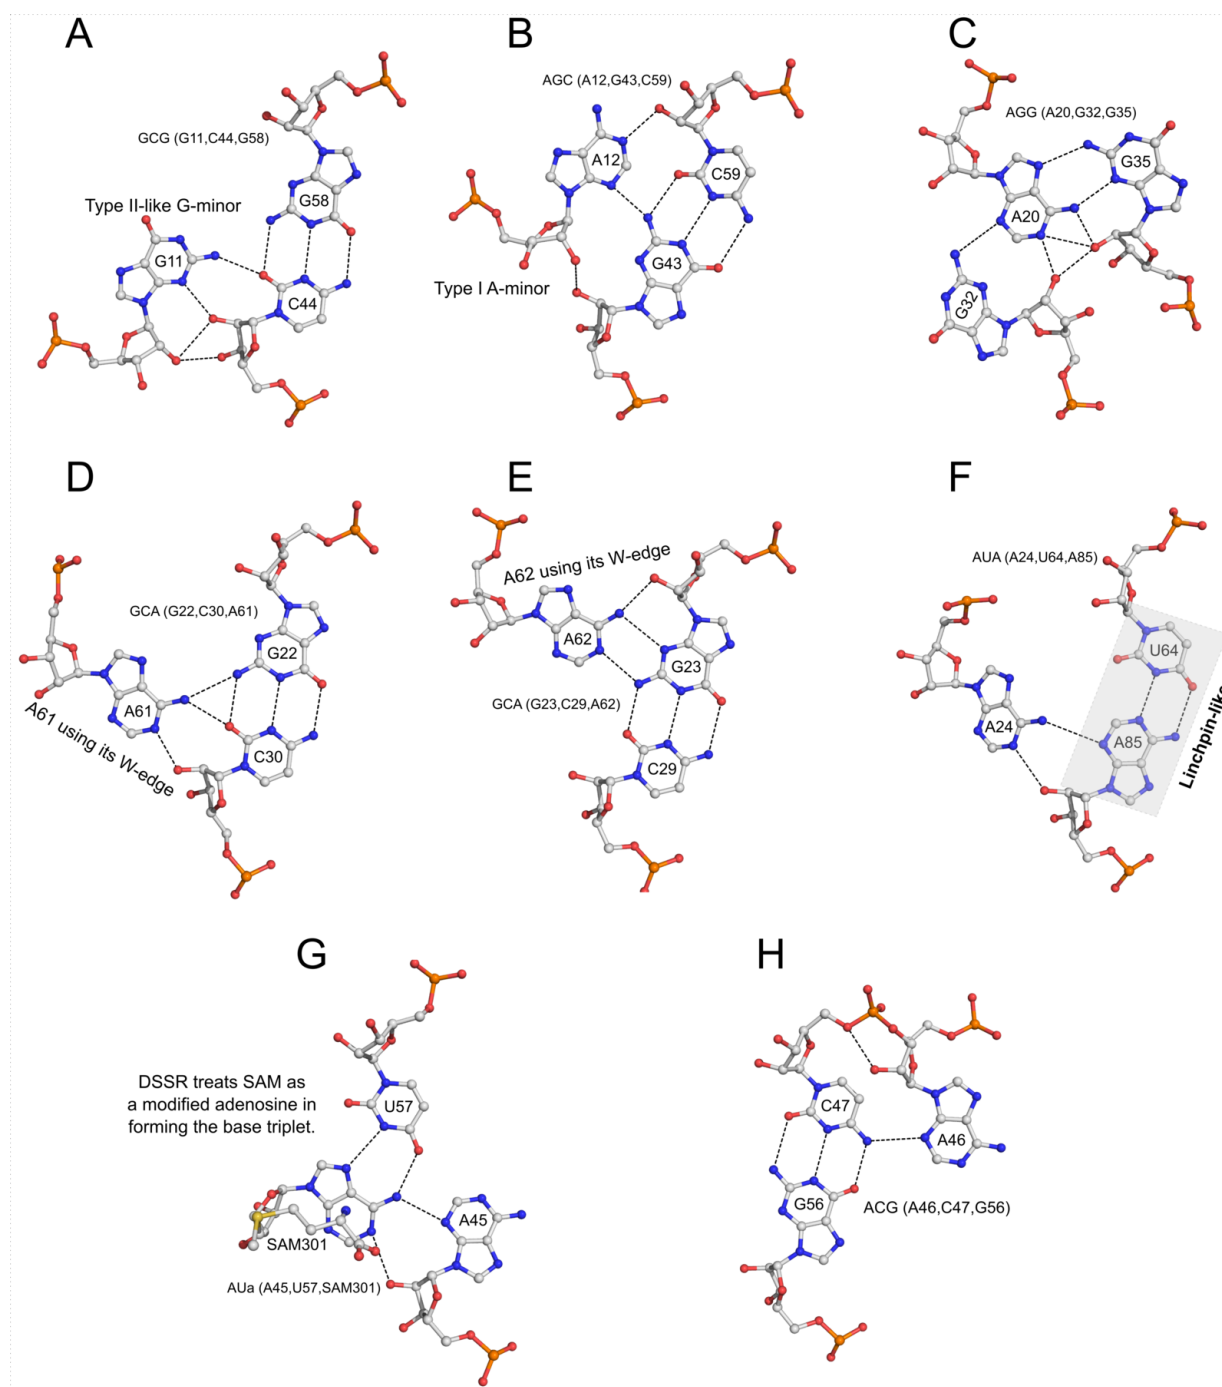

**Figure S7:** The eight base triplets and associated hydrogen bonds (dashed lines) detected by DSSR in the SAM-I riboswitch (PDB id: 2gis). **(A)** GCG (G11, C44, G58), with G11 in a similar position and orientation as in a type II A-minor motif. **(B)** AGC (A12, G43, C59), a type I A-minor motif. **(C)** AGG (A20, G32, G35). **(D)** GCA (G22, C30, A61). **(E)** GCA (G23, C29, A62). **(F)** AUA (A24, U64, A85), with the isolated, linchpin-like U64-A85 pair. **(G)** AUa (A45, U57, SAM301), with the SAM adenosine moiety taken as a modified base in forming the triplet. **(H)** ACG (A46, C47, G56). Note that in **(D)** and **(E)**, A61 and A62 employ their **Watson-Crick** edges, rather than the minor-groove edges as in A-minor motifs, to interact with the minor-groove edges of the two consecutive G–C pairs.



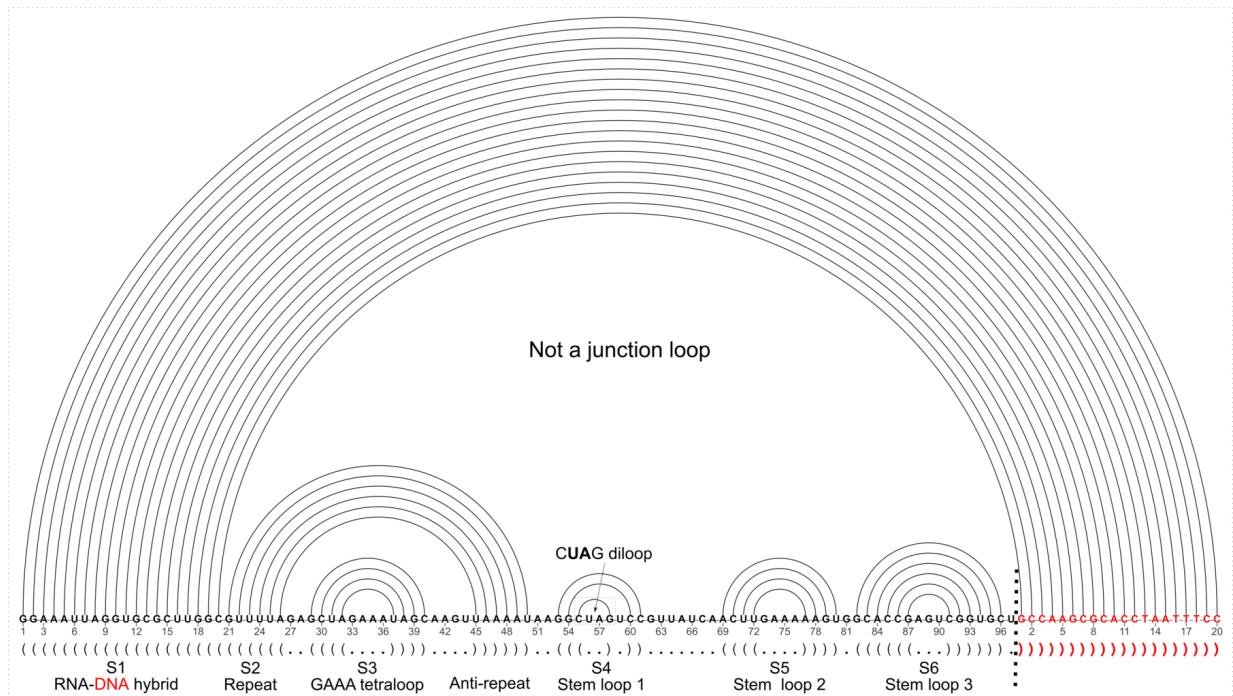

**Figure S8:** The linear (arc) secondary structure diagram of the RNA-DNA hybrid structure in the CRISPR Cas9-sgRNA-DNA ternary complex (PDB id: 4o08), annotated with DSSR-derived dot-bracket notation and key structural elements. The target DNA base sequence is colored red, and the chain switch from sgRNA to DNA is marked by the dotted vertical line. DSSR detects no junction loops in this hybrid structure because of the chain break.

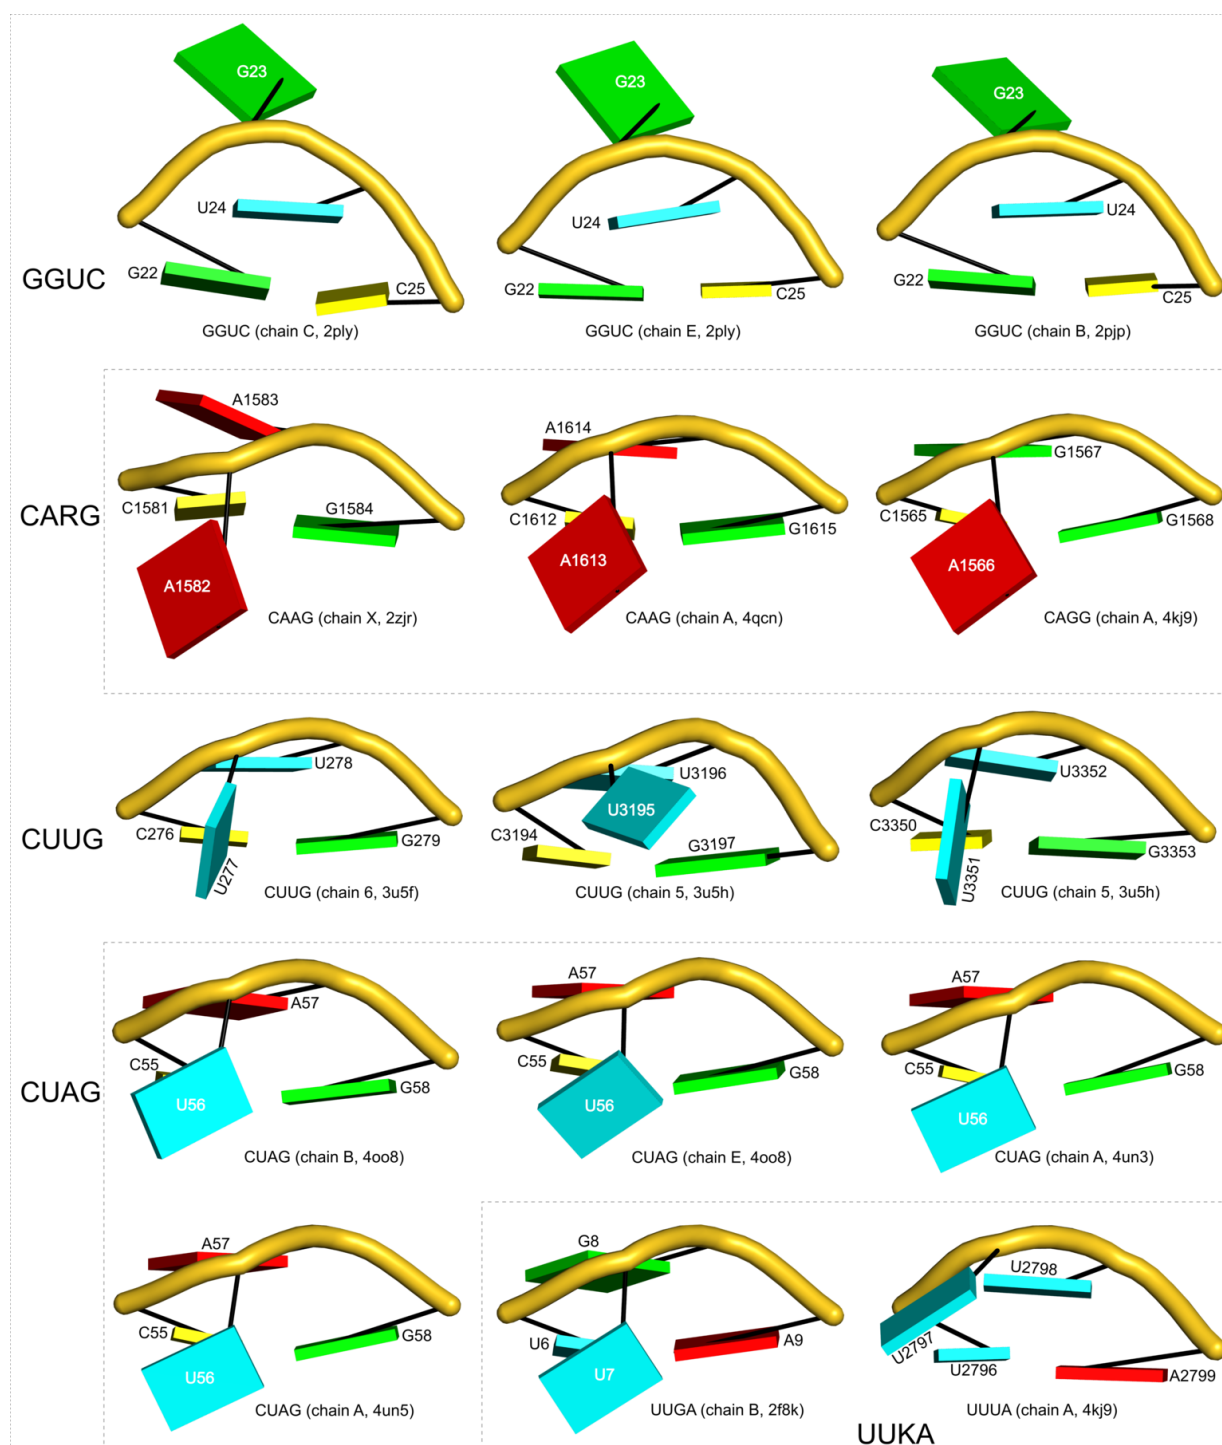

**Figure S9:** Images of 15 diloops (GGUC, CARG, CUUG, CUAG, and UUKA) identified by DSSR in the NR3A-dataset. The diloops can be categorized into five groups by base sequence: GGUC, where the second position G is flipped away from the closing pair; CARG, where the second position A is extruded into the minor-groove side of the closing pair; CUUG, which shows structural variations in the three crystallographic examples and differences from their NMR solution counterpart (PDB id: 1rng, Figure 6C); CUAG, where all four cases occur in Cas9 complexes either without (PDB id: 4oo8) or with (PDB ids: 4un3 and 4un5) a protospacer adjacent motif; and UUKA, where the two cases are quite distinct.

Output of a sample DSSR run on yeast tRNA<sup>Phe</sup> (PDB id: 1ehz)

```

1 *****
2           DSSR: an Integrated Software Tool for
3           Dissecting the Spatial Structure of RNA
4           v1.2.8-2015jun15 by xiangjun@x3dna.org
5
6           This program is being actively maintained and developed. As always,
7           I greatly appreciate your feedback! Please report all DSSR-related
8           issues on the 3DNA Forum (forum.x3dna.org). I strive to respond
9           *promptly* to *any questions* posted there.
10
11 *****
12 Note: Each nucleotide is identified by model:chainId.name#, where the
13       'model:' portion is omitted if no model number is available (as
14       is often the case for x-ray crystal structures in the PDB). So a
15       common example would be B.A1689, meaning adenosine #1689 on
16       chain B. One-letter base names for modified nucleotides are put
17       in lower case (e.g., 'c' for 5MC). For further information about
18       the output notation, please refer to the DSSR User Manual.
19       Questions and suggestions are always welcome on the 3DNA Forum.
20
21 Command: x3dna-dssr -i=1ehz.pdb --u-turn --non-pair --po4 -o=1ehz.out
22 Date and time: Tue Jul 14 06:36:37 2015
23 File name: 1ehz.pdb
24     no. of DNA/RNA chains: 1 [A=76]
25     no. of nucleotides:    76
26     no. of atoms:         1821
27     no. of waters:        160
28     no. of metals:        9 [Mg=6,Mn=3]
29
30 *****
31 List of 11 types of 14 modified nucleotides
32     nt      count  list
33     1 1MA-a    1    A.1MA58
34     2 2MG-g    1    A.2MG10
35     3 5MC-c    2    A.5MC40 ,A.5MC49
36     4 5MU-t    1    A.5MU54
37     5 7MG-g    1    A.7MG46
38     6 H2U-u    2    A.H2U16 ,A.H2U17
39     7 M2G-g    1    A.M2G26
40     8 OMC-c    1    A.OMC32
41     9 OMG-g    1    A.OMG34
42    10 PSU-P    2    A.PSU39 ,A.PSU55
43    11 YYG-g    1    A.YYG37
44
45 *****
46 List of 34 base pairs
47     nt1      nt2      bp  name      Saenger  LW  DSSR
48     1 A.G1      A.C72      G-C  WC        19-XIX  cWW  cW-W
49     2 A.C2      A.G71      C-G  WC        19-XIX  cWW  cW-W
50     3 A.G3      A.C70      G-C  WC        19-XIX  cWW  cW-W
51     4 A.G4      A.U69      G-U  Wobble    28-XXVIII  cWW  cW-W
52     5 A.A5      A.U68      A-U  WC        20-XX   cWW  cW-W
53     6 A.U6      A.A67      U-A  WC        20-XX   cWW  cW-W
54     7 A.U7      A.A66      U-A  WC        20-XX   cWW  cW-W
55     8 A.U8      A.A14      U-A  rHoogsteen 24-XXIV  tWH  tW-M
56     9 A.U8      A.A21      U+A  --        n/a     tSW  tm+W
57    10 A.A9      A.A23      A+A  --        02-II   tHH  tM+M
58    11 A.2MG10  A.C25      g-C  WC        19-XIX  cWW  cW-W
59    12 A.2MG10  A.G45      g+G  --        n/a     cHS  cM+m
60    13 A.C11      A.G24      C-G  WC        19-XIX  cWW  cW-W

```

```

61 14 A.U12      A.A23      U-A WC      20-XX      cWW cW-W
62 15 A.C13      A.G22      C-G WC      19-XIX     cWW cW-W
63 16 A.G15      A.C48      G+C rWC     22-XXII    tWW tW+W
64 17 A.H2U16    A.U59      u+U --      n/a        tSW tm+W
65 18 A.G18      A.PSU55    G+P --      n/a        tWS tW+m
66 19 A.G19      A.C56      G-C WC      19-XIX     cWW cW-W
67 20 A.G22      A.7MG46    G-g --      07-VII     tHW tM-W
68 21 A.M2G26    A.A44      g-A Imino   08-VIII    cWW cW-W
69 22 A.C27      A.G43      C-G WC      19-XIX     cWW cW-W
70 23 A.C28      A.G42      C-G WC      19-XIX     cWW cW-W
71 24 A.A29      A.U41      A-U WC      20-XX      cWW cW-W
72 25 A.G30      A.5MC40    G-c WC      19-XIX     cWW cW-W
73 26 A.A31      A.PSU39    A-P --      n/a        cWW cW-W
74 27 A.OMC32    A.A38      c-A --      n/a        c.W c.-W
75 28 A.U33      A.A36      U-A --      n/a        tSH tm-M
76 29 A.5MC49    A.G65      c-G WC      19-XIX     cWW cW-W
77 30 A.U50      A.A64      U-A WC      20-XX      cWW cW-W
78 31 A.G51      A.C63      G-C WC      19-XIX     cWW cW-W
79 32 A.U52      A.A62      U-A WC      20-XX      cWW cW-W
80 33 A.G53      A.C61      G-C WC      19-XIX     cWW cW-W
81 34 A.5MU54    A.1MA58    t-a rHoogsteen 24-XXIV    tWH tW-M
82
83 *****
84 List of 4 multiplets
85 1 nts=3 UAA A.U8,A.A14,A.A21
86 2 nts=3 AUA A.A9,A.U12,A.A23
87 3 nts=3 gCG A.2MG10,A.C25,A.G45
88 4 nts=3 CGg A.C13,A.G22,A.7MG46
89
90 *****
91 List of 2 helices
92 Note: a helix is defined by base-stacking interactions, regardless of bp
93 type and backbone connectivity, and may contain more than one stem.
94 helix#number[stems-contained] bps=number-of-base-pairs in the helix
95 bp-type: '|' for a canonical WC/wobble pair, '.' otherwise
96 helix-form: classification of a dinucleotide step comprising the bp
97 above the given designation and the bp that follows it. Types
98 include 'A', 'B' or 'Z' for the common A-, B- and Z-form helices,
99 '.' for an unclassified step, and 'x' for a step without a
100 continuous backbone.
101 -----
102 helix#1[2] bps=15
103 strand-1 5'-GCGGAUUcUGUGtPC-3'
104 bp-type  ||| ||| ||| ||| ||| ..|
105 strand-2 3'-CGCUUAAGACACaGG-5'
106 helix-form AA...xAAAAxx.
107 1 A.G1      A.C72      G-C WC      19-XIX     cWW cW-W
108 2 A.C2      A.G71      C-G WC      19-XIX     cWW cW-W
109 3 A.G3      A.C70      G-C WC      19-XIX     cWW cW-W
110 4 A.G4      A.U69      G-U Wobble   28-XXVIII  cWW cW-W
111 5 A.A5      A.U68      A-U WC      20-XX      cWW cW-W
112 6 A.U6      A.A67      U-A WC      20-XX      cWW cW-W
113 7 A.U7      A.A66      U-A WC      20-XX      cWW cW-W
114 8 A.5MC49   A.G65      c-G WC      19-XIX     cWW cW-W
115 9 A.U50     A.A64      U-A WC      20-XX      cWW cW-W
116 10 A.G51    A.C63      G-C WC      19-XIX     cWW cW-W
117 11 A.U52    A.A62      U-A WC      20-XX      cWW cW-W
118 12 A.G53    A.C61      G-C WC      19-XIX     cWW cW-W
119 13 A.5MU54  A.1MA58    t-a rHoogsteen 24-XXIV    tWH tW-M
120 14 A.PSU55  A.G18      P+G --      n/a        tSW tm+W
121 15 A.C56    A.G19      C-G WC      19-XIX     cWW cW-W
122 -----
123 helix#2[2] bps=15

```

```

124 strand-1 5'-AAPcUGGAgCUCAGu-3'
125 bp-type ...||||.||||...
126 strand-2 3'-UcAGACCgCGAGUCU-5'
127 helix-form x..AAAAxAA.xxx
128 1 A.A36 A.U33 A-U -- n/a tHS tM-m
129 2 A.A38 A.OMC32 A-c -- n/a cW. cW-.
130 3 A.PSU39 A.A31 P-A -- n/a cWW cW-W
131 4 A.5MC40 A.G30 c-G WC 19-XIX cWW cW-W
132 5 A.U41 A.A29 U-A WC 20-XX cWW cW-W
133 6 A.G42 A.C28 G-C WC 19-XIX cWW cW-W
134 7 A.G43 A.C27 G-C WC 19-XIX cWW cW-W
135 8 A.A44 A.M2G26 A-g Imino 08-VIII cWW cW-W
136 9 A.2MG10 A.C25 g-C WC 19-XIX cWW cW-W
137 10 A.C11 A.G24 C-G WC 19-XIX cWW cW-W
138 11 A.U12 A.A23 U-A WC 20-XX cWW cW-W
139 12 A.C13 A.G22 C-G WC 19-XIX cWW cW-W
140 13 A.A14 A.U8 A-U rHoogsteen 24-XXIV tHW tM-W
141 14 A.G15 A.C48 G+C rWC 22-XXII tWW tW+W
142 15 A.H2U16 A.U59 u+U -- n/a tSW tm+W
143
144 *****
145 List of 4 stems
146 Note: a stem is defined as a helix consisting of only canonical WC/wobble
147 pairs, with a continuous backbone.
148 stem#number[#helix-number containing this stem]
149 Other terms are defined as in the above Helix section.
150 -----
151 stem#1[#1] bps=7
152 strand-1 5'-GCGGAUU-3'
153 bp-type |||||||
154 strand-2 3'-CGCUUAA-5'
155 helix-form AA....
156 1 A.G1 A.C72 G-C WC 19-XIX cWW cW-W
157 2 A.C2 A.G71 C-G WC 19-XIX cWW cW-W
158 3 A.G3 A.C70 G-C WC 19-XIX cWW cW-W
159 4 A.G4 A.U69 G-U Wobble 28-XXVIII cWW cW-W
160 5 A.A5 A.U68 A-U WC 20-XX cWW cW-W
161 6 A.U6 A.A67 U-A WC 20-XX cWW cW-W
162 7 A.U7 A.A66 U-A WC 20-XX cWW cW-W
163 -----
164 stem#2[#2] bps=4
165 strand-1 5'-gCUC-3'
166 bp-type ||||
167 strand-2 3'-CGAG-5'
168 helix-form AA.
169 1 A.2MG10 A.C25 g-C WC 19-XIX cWW cW-W
170 2 A.C11 A.G24 C-G WC 19-XIX cWW cW-W
171 3 A.U12 A.A23 U-A WC 20-XX cWW cW-W
172 4 A.C13 A.G22 C-G WC 19-XIX cWW cW-W
173 -----
174 stem#3[#2] bps=4
175 strand-1 5'-CCAG-3'
176 bp-type ||||
177 strand-2 3'-GGUc-5'
178 helix-form AAA
179 1 A.C27 A.G43 C-G WC 19-XIX cWW cW-W
180 2 A.C28 A.G42 C-G WC 19-XIX cWW cW-W
181 3 A.A29 A.U41 A-U WC 20-XX cWW cW-W
182 4 A.G30 A.5MC40 G-c WC 19-XIX cWW cW-W
183 -----
184 stem#4[#1] bps=5
185 strand-1 5'-cUGUG-3'
186 bp-type |||||

```

```

187     strand-2 3'-GACAC-5'
188     helix-form AAAA
189     1 A.5MC49      A.G65      c-G WC      19-XIX     cWW cW-W
190     2 A.U50       A.A64      U-A WC      20-XX     cWW cW-W
191     3 A.G51       A.C63      G-C WC      19-XIX     cWW cW-W
192     4 A.U52       A.A62      U-A WC      20-XX     cWW cW-W
193     5 A.G53       A.C61      G-C WC      19-XIX     cWW cW-W
194
195 *****
196 List of 1 isolated WC/wobble pair
197 Note: isolated WC/wobble pairs are assigned negative indices to
198 differentiate them from the stem numbers, which are positive.
199 -----
200 [#1]    -1 A.G19      A.C56      G-C WC      19-XIX     cWW cW-W
201
202 *****
203 List of 2 coaxial stacks
204     1 Helix#1 contains 2 stems: [#1,#4]
205     2 Helix#2 contains 2 stems: [#3,#2]
206
207 *****
208 List of 92 non-pairing interactions
209     1 A.G1      A.C2      stacking: 5.4(2.6) --pm(>>,forward) H-bonds [1]: "OP2*OP2
210         ↪ [2.99]"
211     2 A.G1      A.A73     stacking: 2.4(1.2) --mm(<>,outward)
212     3 A.C2      A.G3      stacking: 0.5(0.0) --pm(>>,forward)
213     4 A.G3      A.G4      stacking: 3.2(1.8) --pm(>>,forward)
214     5 A.G3      A.G71     stacking: 2.6(0.3) --mm(<>,outward)
215     6 A.G4      A.A5      stacking: 5.6(3.5) --pm(>>,forward)
216     7 A.A5      A.U6      stacking: 5.9(4.3) --pm(>>,forward)
217     8 A.U6      A.U7      stacking: 0.6(0.0) --pm(>>,forward)
218     9 A.U7      A.5MC49   stacking: 1.2(0.0) --pm(>>,forward) H-bonds [1]: "O2'(
219         ↪ hydroxyl)-OP2 [2.68]"
220     10 A.U8     A.C13     stacking: 2.0(0.0) --pp(><,inward)
221     11 A.U8     A.G15     stacking: 0.5(0.0) --mm(<>,outward)
222     12 A.A9     A.C11     H-bonds [1]: "O2'(hydroxyl)-N4(amino) [2.90]"
223     13 A.A9     A.C13     H-bonds [1]: "OP2-N4(amino) [3.01]"
224     14 A.A9     A.G22     stacking: 0.1(0.0) --mp(<<,backward)
225     15 A.A9     A.G45     stacking: 1.6(0.5) --pp(><,inward)
226     16 A.A9     A.7MG46   stacking: 1.6(0.7) --mm(<>,outward) H-bonds [1]: "O5'-N2(
227         ↪ amino) [3.34]"
228     17 A.2MG10  A.C11     stacking: 4.2(1.3) --pm(>>,forward)
229     18 A.2MG10  A.M2G26   stacking: 1.0(0.0) --mm(<>,outward)
230     19 A.C11     A.U12     stacking: 0.9(0.0) --pm(>>,forward)
231     20 A.U12     A.C13     stacking: 1.3(0.3) --pm(>>,forward)
232     21 A.A14     A.G15     stacking: 2.4(0.8) --pm(>>,forward)
233     22 A.A14     A.G22     stacking: 1.9(0.1) --mm(<>,outward)
234     23 A.G15     A.H2U16   stacking: 0.4(0.0) --pm(>>,forward)
235     24 A.G15     A.U59     stacking: 0.4(0.0) --pm(>>,forward)
236     25 A.H2U16  A.C60     stacking: 1.4(0.0) --pm(>>,forward) H-bonds [1]: "O2'(
237         ↪ hydroxyl)-N3 [3.46]"
238     26 A.H2U17  A.G18     H-bonds [1]: "O2'(hydroxyl)-OP1 [2.97]"
239     27 A.G18     A.G57     stacking: 4.3(1.5) --pp(><,inward) H-bonds [3]: "O3'-N2(
240         ↪ amino) [3.29], O2'(hydroxyl)-N1(imino) [3.04], O2'(hydroxyl)-N2(amino) [2.71]"
241     28 A.G18     A.1MA58   stacking: 8.3(3.6) --mm(<>,outward) H-bonds [2]: "N2(
242         ↪ amino)-O5' [3.22], N2(amino)-O4' [3.11]"
243     29 A.G19     A.G57     stacking: 3.3(0.9) --mm(<>,outward) H-bonds [1]: "O4'-N2(
244         ↪ amino) [3.17]"
245     30 A.G19     A.C60     H-bonds [1]: "OP1-N4(amino) [3.27]"
246     31 A.G20     A.A21     H-bonds [1]: "OP1*OP2 [2.74]"
247     32 A.G20     A.G22     H-bonds [1]: "N2(amino)-O4' [3.24]"
248     33 A.A21     A.G22     H-bonds [1]: "O2'(hydroxyl)-O4' [3.44]"
249     34 A.A21     A.7MG46   stacking: 5.0(2.1) --pp(><,inward)

```

```

243 35 A.A21      A.C48      stacking: 5.9(2.9) --mm(<>,outward)
244 36 A.G22      A.A23      stacking: 1.1(0.1) --pm(>>,forward)
245 37 A.A23      A.G24      stacking: 4.1(3.3) --pm(>>,forward)
246 38 A.G24      A.C25      stacking: 7.5(4.2) --pm(>>,forward)
247 39 A.C25      A.M2G26    stacking: 2.0(1.0) --pm(>>,forward)
248 40 A.M2G26    A.C27      stacking: 6.8(3.6) --pm(>>,forward)
249 41 A.C27      A.C28      stacking: 0.9(0.1) --pm(>>,forward)
250 42 A.C28      A.G43      stacking: 0.2(0.0) --mm(<>,outward)
251 43 A.A29      A.G30      stacking: 2.4(2.2) --pm(>>,forward)
252 44 A.A29      A.G42      stacking: 2.8(1.6) --mm(<>,outward)
253 45 A.G30      A.A31      stacking: 6.3(3.5) --pm(>>,forward)
254 46 A.G30      A.U41      stacking: 0.8(0.0) --mm(<>,outward)
255 47 A.A31      A.OMC32    stacking: 6.2(4.1) --pm(>>,forward)
256 48 A.OMC32    A.U33      stacking: 3.6(1.3) --pm(>>,forward)
257 49 A.U33      A.A35      H-bonds [1]: "O2'(hydroxyl)-N7 [2.37]"
258 50 A.U33      A.YYG37    H-bonds [1]: "O2'(hydroxyl)-O22 [3.41]"
259 51 A.OMG34    A.A35      stacking: 6.0(4.1) --pm(>>,forward) H-bonds [1]: "O2'(
    ↪ hydroxyl)-O4' [3.33]"
260 52 A.A35      A.A36      stacking: 4.7(2.1) --pm(>>,forward)
261 53 A.A36      A.YYG37    stacking: 5.3(3.9) --pm(>>,forward) H-bonds [4]: "O2'(
    ↪ hydroxyl)-O4' [2.49], N6(amino)-O17 [3.25], N6(amino)*N20 [2.94], N6(amino)-O22 [3.25]"
262 54 A.YYG37    A.A38      stacking: 7.7(3.5) --pm(>>,forward)
263 55 A.A38      A.PSU39    stacking: 5.9(4.1) --pm(>>,forward)
264 56 A.PSU39    A.5MC40    stacking: 5.4(1.1) --pm(>>,forward)
265 57 A.G42      A.G43      stacking: 3.3(1.8) --pm(>>,forward)
266 58 A.G43      A.A44      stacking: 4.7(2.9) --pm(>>,forward)
267 59 A.A44      A.G45      stacking: 5.4(2.5) --pm(>>,forward)
268 60 A.7MG46    A.C48      H-bonds [1]: "O2'(hydroxyl)-OP2 [3.55]"
269 61 A.U47      A.5MC49    H-bonds [1]: "O2'(hydroxyl)-O3' [3.21]"
270 62 A.U47      A.U50      H-bonds [1]: "O2'(hydroxyl)-OP1 [2.71]"
271 63 A.C48      A.5MC49    H-bonds [1]: "O2'(hydroxyl)-OP1 [3.13]"
272 64 A.C48      A.U59      H-bonds [1]: "O2'(hydroxyl)-O2'(hydroxyl) [3.07]"
273 65 A.U50      A.G51      stacking: 0.4(0.0) --pm(>>,forward)
274 66 A.U50      A.G65      stacking: 0.4(0.0) --mm(<>,outward)
275 67 A.G51      A.U52      stacking: 6.8(4.0) --pm(>>,forward)
276 68 A.G51      A.A64      stacking: 2.5(1.1) --mm(<>,outward)
277 69 A.G53      A.5MU54    stacking: 7.9(3.4) --pm(>>,forward)
278 70 A.G53      A.A62      stacking: 4.2(2.0) --mm(<>,outward)
279 71 A.5MU54    A.PSU55    stacking: 5.7(2.2) --pm(>>,forward)
280 72 A.PSU55    A.G57      H-bonds [1]: "O2'(hydroxyl)-N7 [2.72]"
281 73 A.PSU55    A.1MA58    H-bonds [1]: "N3-OP2 [2.77]"
282 74 A.C56      A.G57      stacking: 1.9(1.2) --pm(>>,forward)
283 75 A.1MA58    A.C60      H-bonds [1]: "O2'(hydroxyl)-OP2 [2.42]"
284 76 A.1MA58    A.C61      stacking: 4.8(1.3) --pm(>>,forward)
285 77 A.U59      A.C60      stacking: 6.7(4.2) --pm(>>,forward)
286 78 A.C60      A.C61      H-bonds [1]: "OP1-N4(amino) [3.12]"
287 79 A.A62      A.C63      stacking: 4.7(3.0) --pm(>>,forward)
288 80 A.C63      A.A64      stacking: 0.6(0.0) --pm(>>,forward)
289 81 A.A64      A.G65      stacking: 4.0(2.9) --pm(>>,forward)
290 82 A.G65      A.A66      stacking: 3.3(1.7) --pm(>>,forward)
291 83 A.A66      A.A67      stacking: 4.7(3.9) --pm(>>,forward)
292 84 A.A67      A.U68      stacking: 4.5(3.1) --pm(>>,forward)
293 85 A.U68      A.U69      stacking: 2.6(1.0) --pm(>>,forward)
294 86 A.U69      A.C70      stacking: 0.4(0.0) --pm(>>,forward) H-bonds [1]: "O2'(
    ↪ hydroxyl)-O4' [3.16]"
295 87 A.C70      A.G71      stacking: 1.4(0.2) --pm(>>,forward)
296 88 A.G71      A.C72      stacking: 7.4(4.2) --pm(>>,forward)
297 89 A.C72      A.A73      stacking: 0.3(0.1) --pm(>>,forward)
298 90 A.A73      A.C74      stacking: 6.0(4.0) --pm(>>,forward)
299 91 A.C74      A.C75      stacking: 4.8(2.5) --pm(>>,forward)
300 92 A.C75      A.A76      H-bonds [1]: "O5'*OP1 [3.27]"
301
302 *****

```

```

303 List of 11 stacks
304 Note: a stack is an ordered list of nucleotides assembled together via
305 base-stacking interactions, regardless of backbone connectivity.
306 Stacking interactions within a stem are *not* included.
307 -----
308 1 nts=2 Uc A.U7,A.5MC49
309 2 nts=2 UC A.U8,A.C13
310 3 nts=2 GA A.G65,A.A66
311 4 nts=3 CgC A.C25,A.M2G26,A.C27
312 5 nts=3 gAC A.7MG46,A.A21,A.C48
313 6 nts=3 GtP A.G53,A.5MU54,A.PSU55
314 7 nts=4 GACC A.G1,A.A73,A.C74,A.C75
315 8 nts=4 GAcU A.G30,A.A31,A.OMC32,A.U33
316 9 nts=5 GGGaC A.G19,A.G57,A.G18,A.1MA58,A.C61
317 10 nts=7 gAAgAPc A.OMG34,A.A35,A.A36,A.YYG37,A.A38,A.PSU39,A.5MC40
318 11 nts=9 GAGAGAGUC A.G43,A.A44,A.G45,A.A9,A.G22,A.A14,A.G15,A.U59,A.C60
319 -----
320 Nucleotides not involved in stacking interactions
321 nts=4 uGUA A.H2U17,A.G20,A.U47,A.A76
322
323 *****
324 Note: for the various types of loops listed below, numbers within the first
325 set of brackets are the number of loop nts, and numbers in the second
326 set of brackets are the identities of the stems (positive number) or
327 isolated WC/wobble pairs (negative numbers) to which they are linked.
328
329 *****
330 List of 3 hairpin loops
331 1 hairpin loop: nts=10; [8]; linked by [#2]
332 nts=10 CAGuuGGGAG A.C13,A.A14,A.G15,A.H2U16,A.H2U17,A.G18,A.G19,A.G20,A.A21,A.G22
333 nts=8 AGuuGGGA A.A14,A.G15,A.H2U16,A.H2U17,A.G18,A.G19,A.G20,A.A21
334 2 hairpin loop: nts=11; [9]; linked by [#3]
335 nts=11 GAcUgAAgAPc A.G30,A.A31,A.OMC32,A.U33,A.OMG34,A.A35,A.A36,A.YYG37,A.A38,A.
336 ↪ PSU39,A.5MC40
337 nts=9 AcUgAAgAP A.A31,A.OMC32,A.U33,A.OMG34,A.A35,A.A36,A.YYG37,A.A38,A.PSU39
338 3 hairpin loop: nts=9; [7]; linked by [#4]
339 nts=9 GtPCGaUCC A.G53,A.5MU54,A.PSU55,A.C56,A.G57,A.1MA58,A.U59,A.C60,A.C61
340 nts=7 tPCGaUC A.5MU54,A.PSU55,A.C56,A.G57,A.1MA58,A.U59,A.C60
341
342 *****
343 List of 1 junction
344 1 4-way junction: nts=16; [2,1,5,0]; linked by [#1,#2,#3,#4]
345 nts=16 UUAgCgCGAGgUCcGA A.U7,A.U8,A.A9,A.2MG10,A.C25,A.M2G26,A.C27,A.G43,A.A44,A.G45,
346 ↪ A.7MG46,A.U47,A.C48,A.5MC49,A.G65,A.A66
347 nts=2 UA A.U8,A.A9
348 nts=1 g A.M2G26
349 nts=5 AGgUC A.A44,A.G45,A.7MG46,A.U47,A.C48
350 nts=0
351
352 *****
353 List of 1 non-loop single-stranded segment
354 1 nts=4 ACCA A.A73,A.C74,A.C75,A.A76
355
356 *****
357 List of 1 kissing loop interaction
358 1 isolated-pair #-1 between hairpin loops #1 and #3
359
360 *****
361 List of 2 U-turns
362 1 A.U33-A.A36 H-bonds [1]: "N3(imino)-OP2[2.80]" nts=6 cUgAAg A.OMC32,A.U33,A.OMG34,A.
363 ↪ A35,A.A36,A.YYG37
364 2 A.PSU55-A.1MA58 H-bonds [1]: "N3-OP2[2.77]" nts=6 tPCGaU A.5MU54,A.PSU55,A.C56,A.G57,
365 ↪ A.1MA58,A.U59

```



```

362
363 *****
364 List of 18 phosphate interactions
365 1 A.U7          OP1-hbonds [1]: "MG@A.MG580 [2.60]"
366 2 A.A9          OP2-hbonds [1]: "N4@A.C13 [3.01]"
367 3 A.A14         OP2-hbonds [1]: "MG@A.MG580 [1.93]"
368 4 A.H2U16       OP2-cap: "A.H2U16"
369 5 A.G18         OP1-hbonds [1]: "O2'@A.H2U17 [2.97]"
370 6 A.G19         OP1-hbonds [2]: "N4@A.C60 [3.27], MN@A.MN530 [2.19]"
371 7 A.G20         OP1-hbonds [1]: "MG@A.MG540 [2.07]"
372 8 A.A21         OP2-hbonds [1]: "MG@A.MG540 [2.11]"
373 9 A.A23         OP2-hbonds [1]: "N6@A.A9 [3.12]"
374 10 A.A35        OP2-cap: "A.U33"
375 11 A.A36        OP2-hbonds [1]: "N3@A.U33 [2.80]"
376 12 A.YYG37     OP2-hbonds [1]: "MG@A.MG590 [2.53]"
377 13 A.C48        OP2-hbonds [1]: "O2'@A.7MG46 [3.55]"
378 14 A.5MC49     OP1-hbonds [1]: "O2'@A.C48 [3.13]" OP2-hbonds [1]: "O2'@A.U7 [2.68]"
379 15 A.U50        OP1-hbonds [1]: "O2'@A.U47 [2.71]"
380 16 A.G57        OP2-cap: "A.PSU55"
381 17 A.1MA58     OP2-hbonds [1]: "N3@A.PSU55 [2.77]"
382 18 A.C60        OP1-hbonds [1]: "N4@A.C61 [3.12]" OP2-hbonds [1]: "O2'@A.1MA58 [2.42]"
383
384 *****
385 This structure contains 1-order pseudoknot
386   o You may want to run DSSR again with the '--nested' option which removes
387     pseudoknots to get a fully nested secondary structure representation.
388
389 *****
390 Secondary structures in dot-bracket notation (dbn) as a whole and per chain
391 >1ehz nts=76 [whole]
392 GCGGAUUUAgCUCAGuuGGGAGAGCgCCAGAcUgAAgAPcUGGAGgUCcUGUGtPCGaUCCACAGAAUUCGCACCA
393 ((((((((((((.....[.])))).((((.....)))))).....((((([.]).....)))))))))....
394 >1ehz-A #1 nts=76 [chain] RNA
395 GCGGAUUUAgCUCAGuuGGGAGAGCgCCAGAcUgAAgAPcUGGAGgUCcUGUGtPCGaUCCACAGAAUUCGCACCA
396 ((((((((((((.....[.])))).((((.....)))))).....((((([.]).....)))))))))....
397
398 *****
399 List of 12 additional files
400 1 dssr-stems.pdb -- an ensemble of stems
401 2 dssr-helices.pdb -- an ensemble of helices (coaxial stacking)
402 3 dssr-pairs.pdb -- an ensemble of base pairs
403 4 dssr-multiplets.pdb -- an ensemble of multiplets
404 5 dssr-hairpins.pdb -- an ensemble of hairpin loops
405 6 dssr-junctions.pdb -- an ensemble of junctions (multi-branch)
406 7 dssr-2ndstrs.bpseq -- secondary structure in bpseq format
407 8 dssr-2ndstrs.ct -- secondary structure in connect table format
408 9 dssr-2ndstrs.dbn -- secondary structure in dot-bracket notation
409 10 dssr-torsions.txt -- backbone torsion angles and suite names
410 11 dssr-Uturns.pdb -- an ensemble of U-turn motifs
411 12 dssr-stacks.pdb -- an ensemble of stacks

```
